# Supplementary material
Source: PubMed Central journal article supplement (PMC5064170)
Supplement: JZUSB17-0763-FS1.pdf [file JZUSB17-0763-FS1.pdf]

## Supplementary materials

This document included the supplementary materials for:

### A genome-wide analysis of the *ASYMMETRIC LEAVES2/LATERAL ORGAN BOUNDARIES (AS2/LOB)* gene family in barley (*Hordeum vulgare* L.)

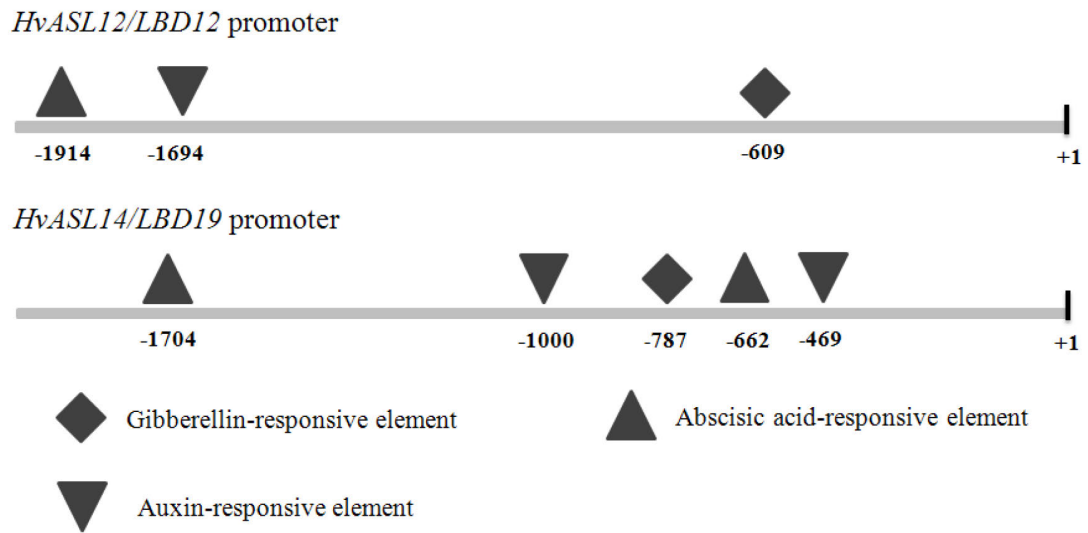

Fig. S1 Promoter analysis of *HvASL12/LBD12* and *HvASL14/LBD19* genes
