# Supplementary material
Source: PubMed Central journal article supplement (PMC5064170)
Supplement: JZUSB17-0763-TS1.pdf [file JZUSB17-0763-TS1.pdf]

## Supplementary materials

This document included the supplementary materials for:

### **A genome-wide analysis of the *ASYMMETRIC LEAVES2/LATERAL ORGAN BOUNDARIES (AS2/LOB)* gene family in barley (*Hordeum vulgare* L.)**

**Table S1** Amino acid sequence of the *ASL/LBD* genes in barley

>HvASL1/LBD1

MAGGSPCASCKLLRRRCKDCIFAPFFPADDPHKFAIVHKVFGASNVSKMLLELPVQQRG  
DAVSSLVYEANARVRDPVYGCVGAIQFLQNVSQLQMLAVAQAEILCIQMQRDGCQS  
QDDAGRNDGHSLAAMQMQMVVDDTAAAEAFMQNGGGGFPPQLMSSYGGAPASNVHH  
YGQDHLKRESLWT

>HvASL2/LBD2

MASSASSFPGSVITMASSAAAAGAASSGAAGTGSPCAACKFLRRKCQPDVCFAPYFPPD  
NPQKFVHVHRVFGASNVTKLLNELNPYQREDAVNSLAYEADMRLRDPVYGCVGVISVLQ  
HQLRQLQQDLARARYELSKYQAAA AVASVGCNGTPAMADFIGNTVPNCTQNF  
STAIGAGLGFHDQFAAVQMLARSYEGEGAVARLGVNNGSGGGYDFGYTSGMGPVSGLG  
PLGGGPFLKHGTAGGDERHTAAQ

>HvASL3/LBD3

MSTASDWQQDHEVGGKIKSESTAEADRMMAAARRSSSLPAAGAGPASTPSFNTMTPCAA  
CKLLRRRCAQECFPSPFFSPLPHKFAVHKVFGASNVSKMLLEVHESQRGDAANSLVYE  
ANLRLRDPVYGCMGAILTLQQQVHALEAELAAVRAEILKHRYRPAAAAAA AVPNVPPSSH  
ASQLLAAGGHRPAGAMGLPAPAVGPVASASSSTTVYAAASSSTDYSSITHENAPYFG

>HvASL4/LBD4

MESSGDTAPLHSSPTPTSPAMATGTAVVMSPCAACKILRRRCVDRCVLAPYFPPTDPHKF  
ATAHRVFGASNIKLLQDLPEEQRADAVSSMVYEAAARARDPVYGSAGAICQLQRQVDGL  
KAQLARAQAEAAARAHHAHLVALLCVEVATAAATPPQDAYCSGGGSQSQLAAPPVVG  
SAPADALYVVDGSAAGGGGIMQAGHVGWADEPLWT

>HvASL21/LBD5

MRGSERAAVSTSTSGMSCNGCRVLRKGCNDACMLRPCLLWIEGADAQGHATIFAAKFFG  
RAGLMSFLTAVPESQRPAVFQSLLYEAAGRITNPVGGAVGLLWAGSWHLCEAAVQTVLRG  
GAIRPLPELAGGVPEGVGGSDLFASSRRRAVVCSTYSMAKRVTPRKTWAPAAASHHQE  
PSCDLGLFLTPGSAAA AEGERRARRAGTPSMSSDGSVTTTAGAGADGDKEPELLNLFV

>HvASL20/LBD6

MRLSCNGCRVLRKGCSEDCSIRPCLQWIKSPEAQANATVFLAKFYGRAGLMNLINAGTDD  
SLRPGIFRSLLYEACGRIVNPIYGSVGLLWSNNWQMCQAAVEAVLSGKPIVQVSSDAAA  
DRTPLKAYDIRHVSTSPAADGRLHKVAKPGRTRFRKRASSASSHHNPSSDSNNKPKPQPRP  
PTAEELDRQHRKEMEEGAFQRAPSHSSDSRHEDPVEPHSQQEASADTEAEAGSHVSQA  
EQEQEQSTEPADHAEEVEKDDEELGLELTLGFAPVAARPAGCHLSVRTAAEPFVGLRFL

>HvASL22/LBD7

MRMSCNGCRVLRKGC GEGCTIRPCLEWIRSPDAQANATVFLAKFYGRAGLLNLLAAVPD  
AGLRPPLFRSLLYEACGRMANPVYGSV GMLWSAQWEACQAAVEAVLKGRPIVRVSSDAP  
LAPCDIRHVAKPDRPAAAGTLPGVSRAGRTRFKRASSSTAKTKSSFS DANKHDDGLDQAP  
SHEESAGSHVEDGGMAVEQAREEELSEGTEVDAGSHVSQAEHSPAPPVAKDEEAHGDEIG  
LELTLGIQTVAPRLVVRSPACFGASSSNAQSSHIGLLEL PVS

>HvASL5/LBD8

MASPSSTGNSIVSVVVA AATTPGAGAPCAACKFLRRKCLPGCVFAPYFPPEEPQKFANVHK  
VFGASNVTKLLNELPPHQREDAVSSLAYEAEARVKDPVYGC VGAISVLQRQVHRLQKEL  
DAAHTELLRYACGELGSIPTALPVVTAGVPSGRLSSAVMPCPGQLAGGMYSGGGGGGFRR  
LGLVDAIVPQPPLSAGCYYNMRSNNNAGGSVAADVAPVQIPYASMANWAVNAISTITTT S  
GSESIGMDHKEGGDSSM

>HvASL6/LBD9

MASSASSLPAPGGSVITLAASSAGGNGAGGVC GTGSPCAACKFLRRKCQPD CVFAPYFP  
PDNPQKFVHVHRVFGASNVTKLLNELHPYQREDAVNSL AYEADMRLRDPVYGCVAVISIL  
QRNLRQLQQDLARAKYELSKYQSAAGPNGSQAMA EFIGSAVPNGVASFINVGHSAALGS  
VGGVTGFGQDQQA AVQMLSRSYEAAEPIARLGLNGSY EFGYSASAMTGAGSV PGLGML  
GGSPFLKPGIAGSDERGGAGQ

>HvASL7/LBD10

MTSSSATSSSHLHITITNASSTITNTK SQSQHNHSSSVSPRSGGSGGGSGSGSGS GTTNQ  
ACAACKYQRRKCNPDCLAPYFPADQQRFLNAHRLFGVSNILKTLRRLKPELCEAAMQ  
TLIYQAEMRAMDPVGGCCRMIDLEHTSELLAAEL AALNQHLDLRQAASGVAGGDVMD  
GPCADLEVTSSNHQQEQLLLHADQDQVVDALYVAQEGADPVIQNGADHDDNRQPQYHG  
GQQQQQLYDYFYEATGAGGDEAGRKPGGSGVDINVDVMQHFDYDSSCEVDDHHKVD  
QLEPMISSSLDEHYPIGQKEYEMKVASFVDVLDVRPEMQAVDGNADIGVKEELQEEEDPK  
NNIELSKATHMAESSDCRLGLGF

>HvASL8/LBD11

MPCLLSTLSFLAIPNFTLLYHVPVRLSSPRSQLFLCHSPSPKRGEHASMSTERERLDEIGKKI  
KREPDPAAIAGVVAVSPTTEHHVHRLGPGIGGAVNIATPCAACKLLRRRCAHECPFAPYF  
SPHEPHKFAAVHKVFGASNVS KM LLEVPEAERADAASSLVYEANLRLRDPVYGC MGAIS  
MLQQQVNALEAELEAVRAEIFKHRYRQAGVGVGVGAANLIVDDGAAAAGGFMPSTTL  
VHTADVVSVAEAGQEVATLPATPTATAYAAGQPSSADYSSLNTSEHDAYFG

>HvASL12/LBD12

MIQFTGCKEQEYTTNIDQAPEAMTGFSSPCGACKFLRRKCVSGCVFAPHFCHEQGAAHFA  
AIHKVFGASNASKLLMSLPATDRREAAVTISYEAQARLHDPVYGCVAHIFALQQQVVTLQ  
AQLESLKTGAPQLVSSLEEDSIKAKIMAYEKGEARMPQLGESVKIESES YFGDDVMACTS  
MPYSQGYSSHIYTTDYTDSFNDDSINRSTMFVPDMQEYLQENGY Y

>HvASL11/LBD13

MKEVVAAGGGGGVSPCAACKLLRRRCSPGCVFAPYFPAGEPHRFASVHKVFGASNISKLL  
QEIPAEHRGDAVSSLVYEANARVRDPIYGCVAITSLQRQVESLQTQLALAQAE MVRLRM  
ANAYGAARRNGGGSSASGSPSSISSPTKATPDHHHMAAVNRPGVMELELECSR FWSF

>HvASL23/LBD14

MSCNGCRVLRKGCSDACVLRPSIEWIDGAQPQANATV FVAKFFGRAGLVA SLAAVPLHHR  
PALFRSLLYEACGR TINPVSGAIGLMWTSNWDLCQAAADAVLRGDSLRSLSAVPAAFTDR  
DMAGLYGSGVTNTGSSSSLHSSPENSTSAPAGKR SKNYCGAAAGQQVKLP GPVLPSCELD

LCLTPLSSPLAGRRGGASDEYSTTTCCEEASGDAAEAGAPALLNLFN

>HvASL18/LBD15

MTSVQNIETLFQVGDGRWTKDKVAQALGAANNSPNRAATLLSSAPGQANVPKIASLIISES  
KVPEAPDFPGPSSLSSPEQPILKKQKAKSTGVQIPSTALLASSDVSDSSSPSSKQVDGKKP  
KKVNTCARCRRQKQGCKDCVFADVFTTETQSDYDKASELFGIKSMQNRLSLVQPQDRLQ  
VREAIMWRVAAWANDPLHGPLGRFRNLEREAAAAAASAAAARLAACSFLTTKKHSTIVL  
CHLLLVHIKSQLAKK

>HvASL9/LBD16

MDYSNEATNTAAAQPYGRSMSPSRVSSCSPPPVFPLMGNAPSSPPTIVLSPCAACKVLR  
RCADGCMLAPYFPPTPEAKFTTAHRVFGASNIKLLQDLPESSRADAVSSMVYEAEARLRD  
PVYGCAGAVCRLQKEANELKVDLARAQADLLSIQTQHANLLALVCVEFAANHRGDQQH  
QHQPPLADQLNSIGGSGGGALYQQLYDSLDSASWEEARQLWT

>HvASL19/LBD17

MSSNSPCAACKLLRRKCTQGCVFAPYFPPDQPAKFANVHKVFGASNVSKLLNELPVVQR  
EDAVNSLAYEAEARLRDPVYGCVAYISVLQLKIKQVREEIANARKELSGYIGQAAYAPIVP  
VQHPHAAAAAAQYAAMGLVQPHPHQHQQMAMQQQPYHQQIAEAQHLLAAVEVA  
RSGGQGHQHHQHXXXQHQQHEMMMRQTYGNVHGAAAGPTIAVDPP  
QGAAYDGTAPFLIQQQPSPSALTYRMEEPSPPQSSGSHVDMRAPQQHHQHTDGSDE  
GSGGAPPS

>HvASL13/LBD18

MAGAGVTTTGGSPCGACKFLRRRCAAECVFAPYFCAEDGASQFAAIHKVFGASNAKLLQ  
QVAPGDRSEAAATVTYEAQARLRDPVYGCVAHIFALQQQVAALQAQVAHARTQAQLGAA  
ATAMHPLLQQAWQAAAAEHDDHSITSTQSSSGCYSGAHQRSDDGSSLHGAEMYACGY  
GEQEEGSY

>HvASL14/LBD19

MALGRPLHPNHPQQQQRSPQHRRQQRSGRPPSDPAVITDRLMSMTGLGSPCGACKFLRR  
KCARGCVFAPYFCHEQGAHFHAAIHKVFGASNVSKLLAHLPISDRAEA AVTVSYEAQARL  
RDPVYGCVAHIFALQQQVMTLQAQLASLKAHAPPAPQGMQQHQDDVKGYVGGGAADQ  
YGHGAYQWYNGNGAAAQQCAYGGNGGAVAGHDSITALLSGSAASDYMMYHALEQSA  
SDDDRHAAAAFEAADQSSFGTEESGWRSSSGYQDCEDLQSVAYAYLNRS

>HvASL24/LBD20

MRASCNGCRVLRKGCTDDCTIRPCLAWIRGADAQANATVFLAKFYGRAGLLNLLAAGTD  
AALRPALFRSLLYEACGRVANPVYGATGLFCMGRWEACQDAVQAVFEGRRIAVQSEAVRH  
PGLVAAFDVRHVPKPMVVPAPPGLGVSRAGRTMFKRASSSSTAKPTISSGAKHGDLDR  
PSHEEPAGSHDHVVEDGGMAVAVAVAAKQVRGESSADTGAEAHSHVSQAEQNLMPQLA  
QGGDDEVGLELTLGFGPATRLLRSPPARPDAARRSSAECGHIGLLELPLV

>HvASL15/LBD21

MSSGVGSSTLGGCGGPGSGSGGGGGGLGGGGGGPCGACKFLRRKCVSECFAPYFDSEQ  
GAAHFVAHVHKVFGASNVSKLLQIPAHKRLDAVVTICYEAQARLRDPVYGCVAHIFALQQ  
QVNNLQAEITYLQTHLATLELPSPLPAAPQLPMAMPAQFSISDLPTTNIPTTIDLSALFEP  
PAQPQWALQQHHQHQLRQPSYGAMAHRGGSSMAEGSAGSGGDLQTLARELLDRHGRS  
GVKPELQPPPPHPR

>HvASL10/LBD22

MAGAQTGSSATPCASCKLLRRRCARDCVFAPYFPPEDPHRFATVHRVFGASNVSKMLQEL

PAAQRADAVSSLVYEATARMRDPVYGCAGAISYLQQQVSQLQVQLAVAQAEIIQRINHPS  
SAAFHLQELQQRQAQQQQMQMDDDDKAYSSLVMQNDLMSTLLLQEACLKKE  
>HvASL16/LBD23

MAAAPGGGGGGVAGVAGSPCGACKFLRRRCVAECVFAPYFSSEQGAARFAAIHKVFGA  
SNAKLLAHLPLADRCEAVVTITYEAQSRLRDPVYGCVAQIFALQQQVAILQAQLMQARA  
QIACGVQSTTSPVSVSHHQQQPWSQDTSIAALLRQQENVSSFAAGGALLPELMSGDVSML  
QQHCGGKVEGGGGGAGDLQYLAQAMMQSSNYSL  
>HvASL17/LBD24

MSGSTSVGVGVGAMLSGSSGGPCGACKFLRRKCTDDCIFAPYFSDQGV EHF TAVHKVF  
GASNVSKLLNQTPPKRLDAAITICYEAKARLRDPAYGCVADIFALQQQVENLQAEVGF  
HARLRTLQQTSPPPFSPPYMPMTTEFSISEMASLSNVPNTIDISSLFDPSMQWAFQQQEH  
HQRHQPCGQTEEGSGGIGNTNSNSGDLQALARELLDRRSTRSTP
